# Supplementary material for: Role of RadA and DNA Polymerases in Recombination-Associated DNA Synthesis in Hyperthermophilic Archaea
Source: PubMed Central journal article supplement (PMC7407445; doi:10.3390/biom10071045), 2020-07-14
Supplement: biomolecules-10-01045-s001.pdf [file biomolecules-10-01045-s001.pdf]

**SUPPLEMENTAL DATA**

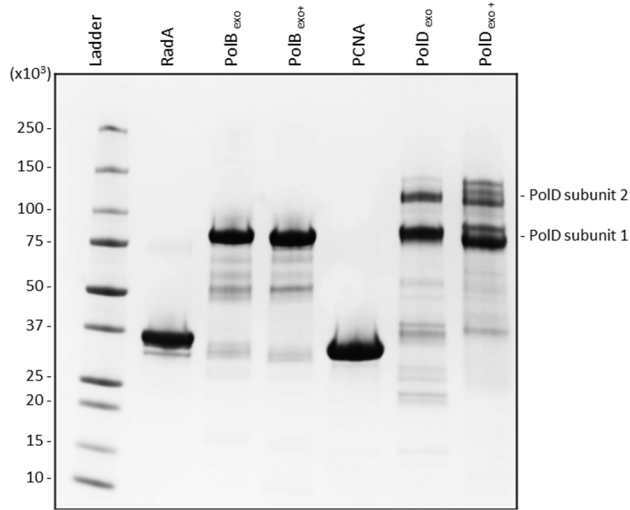

**Figure S1.** Electrophoretic profile of purified *P. abyssi* proteins. 3  $\mu$ g of recombinant protein were loaded after denaturation in SDS-PAGE polyacrylamide gel. Ladder = Precision plus protein standards (BioRad).

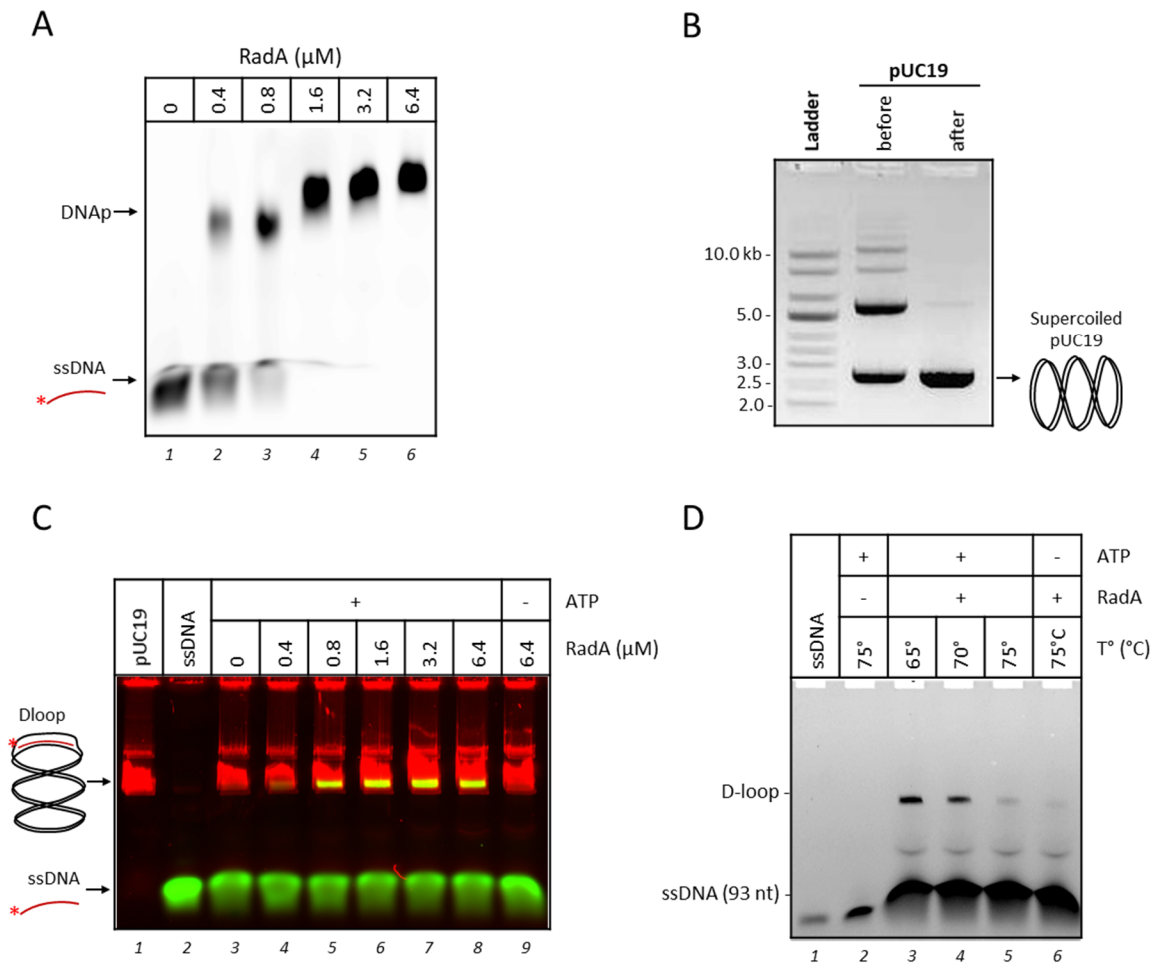

**Figure S2.** RadA DNA binding and strand invasion activities.

(A) ssDNA binding assay. 25 nM labeled ssDNA (93 nt) were incubated with a range of RadA concentration (0, 0.4, 0.8, 1.6, 3.2, 6.4  $\mu$ M) in 20 mM Tris-HCl, pH 8.0, 50  $\mu$ g/mL BSA, 2 mM DTT and 0.5% Triton at 65°C for 10 min. Products were separated on a 0.75% native agarose gel and revealed by fluorescence. (B) Plasmid pUC19 (2686 bp) before and after purification of the supercoiled form. Samples were loaded onto a 1% agarose gel and compared to the supercoiled DNA ladder (N0472S, NEB). (C) D-loop formation assay with RadA. The gel from Figure 1 was stained with Sybr gold and imaged for the two following signals: green= labeled 93 nt ssDNA, red = dsDNA. The superimposition of both signals revealed in yellow the position of the primer engaged in D-loop. (D) D-loop formation assay at different temperature. 25 nM labeled ssDNA were incubated with 1.6  $\mu$ M RadA during 10 min at 65, 70 or 75°C. Then 25 nM of supercoiled pUC19 were added and incubated for another 10 min. DNA products were separated on a 1.2% native agarose gel and revealed by fluorescence.

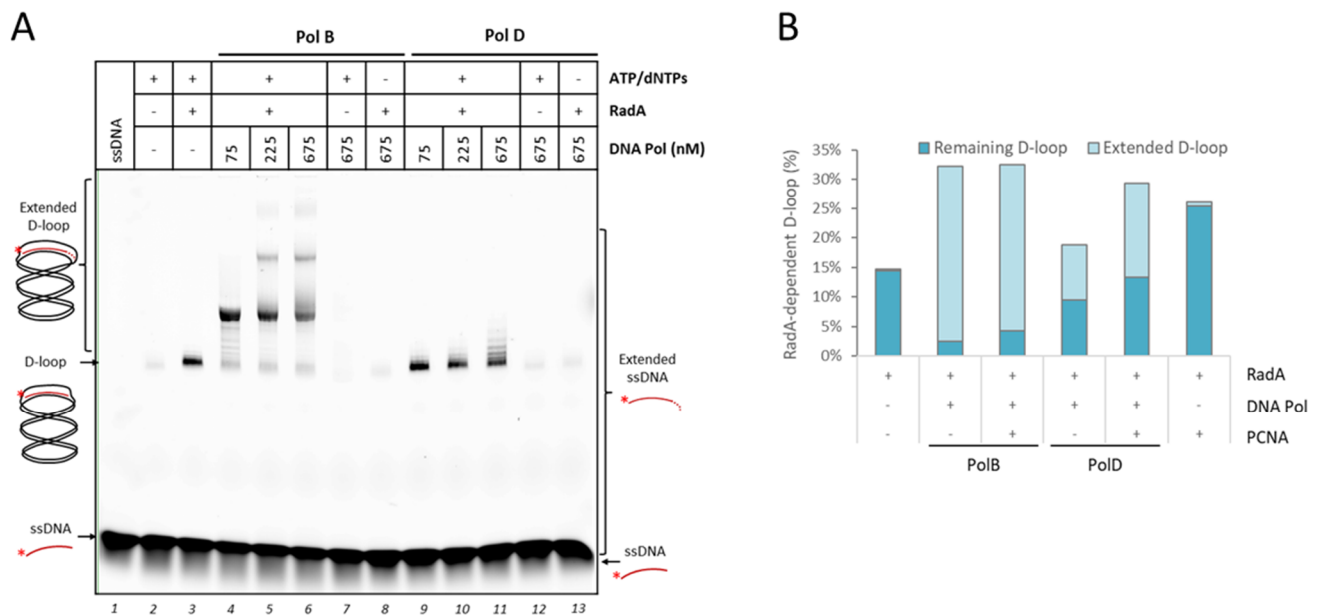

**Figure S3.** D-loop extension assays.

(A) D-loop formation and extension assays with increased concentration of Pol B and Pol D. 25 nM labeled ssDNA were first incubated with 1.6  $\mu$ M RadA during 10 min at 65°C. Then 25 nM of supercoiled pUC19 were added and incubated for another 10 min. D-loop provided by RadA strand exchange activity is extended by (75, 225 or 675 nM) of Pol B or Pol D during 60 min at 65°C. DNA products were separated on a 1.2% native agarose gel and revealed by fluorescence. (B) Histogram representation of the D-loop extension assays as observed in Figure 2.B. RadA dependent D-loop (%), densitometry measurement of remaining D-loop (blue) or extended D-loop (light blue) as a percentage of total lane densitometry after data normalization and D-loop background subtracted.

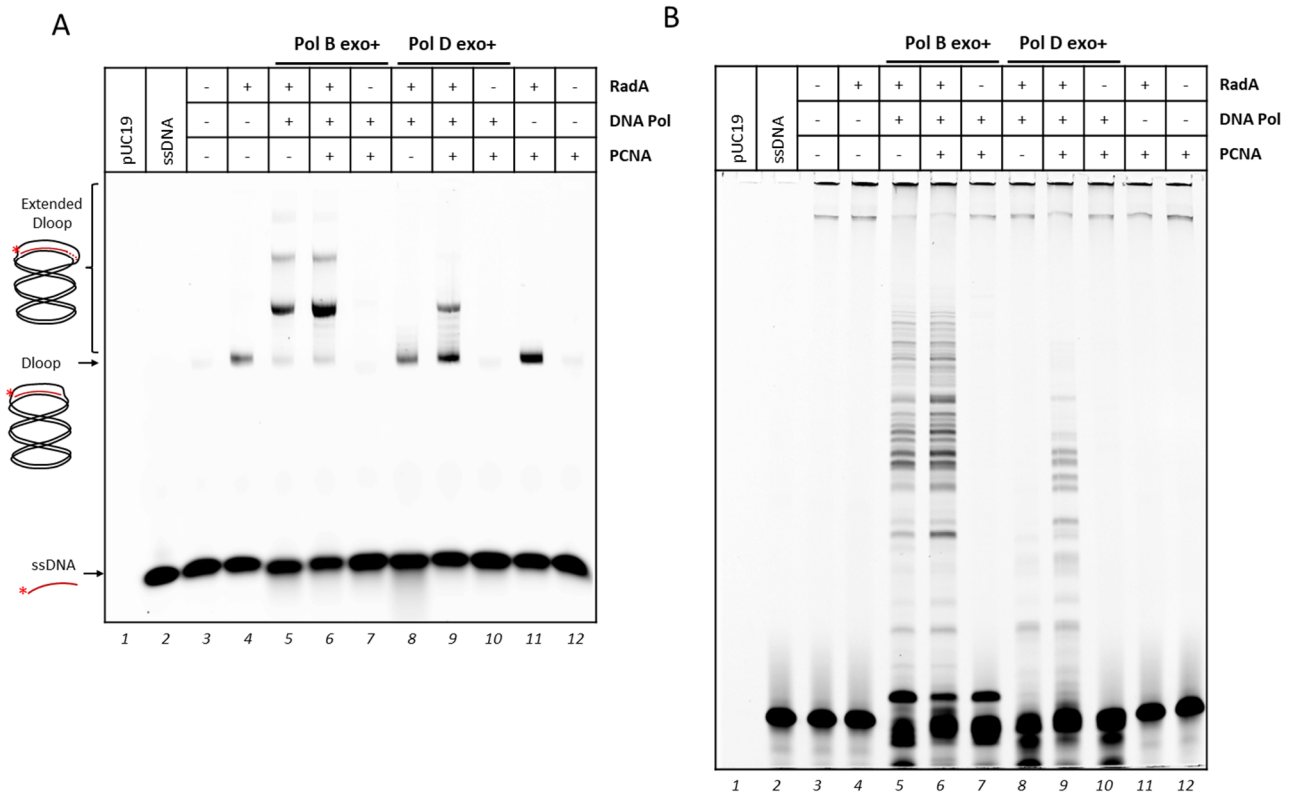

**Figure S4.** D-loop formation and extension assays with Pol B and Pol D *exo+*.

25 nM labeled ssDNA were first incubated with 1.6  $\mu$ M RadA during 10 min at 65°C. Then 25 nM of purified scpUC19 were added and incubated for another 10 min. D-loop generated by RadA strand exchange activity is extended by 675 nM of Pol B or D *exo+* (active for exonuclease activity) during 60 min at 65°C. DNA products were separated on a 1.2% native agarose gel (A) or 15% denaturing acrylamide gel (B). When indicated, 675 nM of PCNA were added together with DNA Pols. Labeled DNA products were revealed by fluorescence.

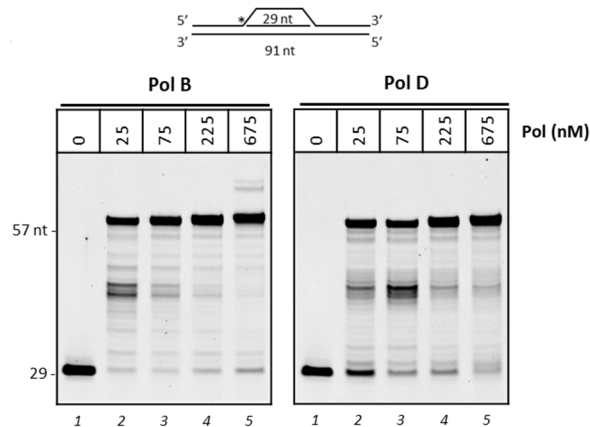

**Figure S5.** DNA synthesis activity on linear D-loop substrate with increased concentrations of Pol B and Pol D.

25 nM synthetic linear D-loop substrate were incubated with a range of concentration of PolB or PolD at 65°C for 60 min. DNA products were separated by gel electrophoresis onto a 15% denaturing acrylamide gel and revealed by fluorescence.

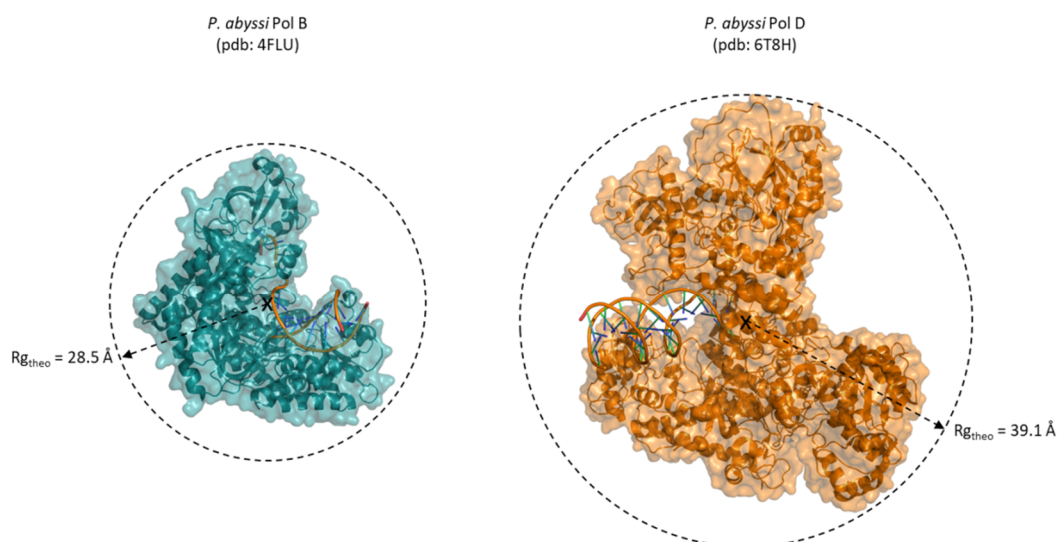

**Figure S6.** *P. abyssii* DNA polymerase structures.

On the left in blue, *PaPol B* structure (pdb:4FLU) and on the right *PaPol D* structure (pdb: 6T8H) within a DNA primer:template substrate inside. The predicted Rg was calculated from the structural data (without DNA chains) using the program CRY SOL and displayed with PYMOL software.

## SUPPLEMENTAL TABLES

**Table S1.** *P. abyssii radA* DNA sequence optimized for *E. coli* expression.

In red, nucleotides modified compared to the original sequence.

```

ATGGGCAAAAAAGAGCAGCGATCCGGCAGTTGTGGAAATTAATGATGTTGATGAACTGGAAACTGGAAGTTGGTGAAGAAGTGACCTGAAAAAGAAA
AAGAAAGAAAAAGAGATCCGCACCATTGAAGATCTGCCAGGTGTTGGTCCGGCAACAGCAGAAAAACTGCGTGAAGCAGGTTTCGATACCTGGAA
GCAATTGCAGTGGCAAGCCCGATTGAACTGAAAGAAGTTGCAAGGCATTAGCGAAGGTGCAGCACTGAAAATTATTCAGGCAGCACGTAAAGCAGCA
AATCTGGGTACCTTCATGCGTGCAGATGAATATCTGAAAAGCGTGAAGCATTGGTCGTATTAGCACCGGAAGCAAAAGCCTGGATAAACTGCTGG
GTGGTGGTATTGAAACCAGGCATTACAGAAGTGTTCCGGTGAATTGGTAGCGGTAAACCCAGCTGGCACACACTGGCCGTGATGGTTCAGCT
GCCGCCGGAAGAAGGTGGTCTGAATGGTAGCGTGATTGGATTGATACAGAGAAACCTTTTCGTCCGGAACGTATTCGCGAAATTGCTAAAATCGT
GGTCTGGATCCGGATGAAGTTCTGAAACATATTTATGTGGCACGTGCATTTAATAGCAATCACCAGATGCTGCTGGTTCAGCAGGCAGAAGATAAAAT
TAAAGAGCTGCTGAATACCGATAAACCGGTTAAACTGCTGATTGTTGATTCACTGACCAGCCATTTTCGTAGCGAGTATATCGGTCGCGGTGCTCTGG
CAGAACGTCAGCAGAAACTGGCAAAACACCTGGCAGATCTGCATCGCTGGCAAATCTGTATGAAATTGCCGTTTTTCGTGACCAATCAGGTTCAGGCA
CGTCCGGATGCTTTTTTTGGTGATCCTACCCGTCCGATTGGAGGTCATATTCTGGCCATTCAGCAACTCTGCCGTTTTATCTGCGTAAAGGTAAGGT
GGCAAACGTGTTGCAGCTCTGATTGATGCACCTCATCTGCCGGAAGGCAGCAGTTTTTCGTATTACCGAAAAAGGTATTGAAGATTAA

```

**Table S2.** Sequences of synthetic oligonucleotides used for linear D-loop extension assays.

| Name            | Sequence 5' to 3'                                                                                    | S <sub>29/91</sub>                                                                       | S <sub>91/29/91</sub>                                                                     |
|-----------------|------------------------------------------------------------------------------------------------------|------------------------------------------------------------------------------------------|-------------------------------------------------------------------------------------------|
| Up1_91 nt       | GCCAGGGACGGGGTGAACCTGCAGGTGGGC<br>GGCTGCTCATCGTAGGTTAGTATCGACCTATT<br>GGTAGAATTCGGCAGCGTCATGCGACGGC  | /                                                                                        |                                                                                           |
| Up2_29 nt 5'Fam | AAGATGTCCTAGCAAGGCACCTAGTAGC                                                                         |                                                                                          | 5' 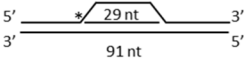 3' |
| Down_91 nt      | GCCGTCGCATGACGCTGCCGAATTCTACCACG<br>CTACTAGGGTGCCTTGCTAGGACATCTTTGCC<br>CACCTGCAGGTTCAACCCCGTCCCTGGC | 3'  5' |                                                                                           |
| Trap_60 nt      | AAGATGTCCTAGCAAGGCACCTAGTAGCGT<br>GGTAGAATTCGGCAGCGTCATGCGACGGC                                      | /                                                                                        | /                                                                                         |

**Table S3.** Sequences of synthetic oligonucleotides used for strand displacement assays.

| Name            | Sequence 5' to 3'                                                                              | S <sub>30/87/30</sub>                                                                      |
|-----------------|------------------------------------------------------------------------------------------------|--------------------------------------------------------------------------------------------|
| Up1_30 nt 5'Cy5 | TGCCAAGCTTGCATGCCTGCAGGTCGACTC                                                                 |                                                                                            |
| Down_87nt       | CAGGAAACAGCTATGACCATGATTACGAATTC<br>GAGCTCGGTACCCGGGATCCTCTAGAGTCG<br>ACCTGCAGGCATGCAAGCTTGGCA | * 5' 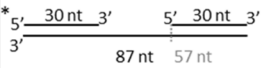 3' |
| Up2_30 nt       | ATTCGTAATCATGGTCATAGCTGTTTCCTG                                                                 |                                                                                            |
| Trap_87 nt      | TGCCAAGCTTGCATGCCTGCAGGTCGACTCTA<br>GAGGATCCCGGGTACCGAGCTCGAATTCGT<br>AATCATGGTCATAGCTGTTTCCTG | /                                                                                          |
